# Supplementary material
Source: publisher site journal article supplement (https://www.dovepress.com/article/448975)
Supplement: Supplementary file 1 [file get_supplementary_file.php]

**Supplementary Material**

**Challenges with estimating long-term overall survival in extensive stage small-cell lung cancer: A validation-based case study**

**Authors:** Sukhvinder Johal, PhD, AstraZeneca, Cambridge, United Kingdom; Lance Brannman, PhD, AstraZeneca, Gaithersburg, Maryland, United States of America; Victor Genestier, MSc, Amaris Consulting, Toronto, Ontario, Canada; Hélène Cawston, MSc, Amaris Consulting, Paris, France

**Corresponding author:** Sukhvinder Johal, PhD, Oncology Business Unit, Oncology Market Access and Pricing, AstraZeneca, Academy House, 136 Hills Road, Cambridge, CB2 8PA, United Kingdom, [sukhvinder.johal@astrazeneca.com](mailto:sukhvinder.johal@astrazeneca.com)

**Declarations**

**Funding:** This study was sponsored by AstraZeneca. The sponsor was involved in data collection, data analysis and manuscript preparation.

**Conflicts of interest:** This study was funded by AstraZeneca. Amaris received a consultancy fee from AstraZeneca to support this analysis and develop the manuscript. Victor Genestier and Hélène Cawston are employees of Amaris. Sukhvinder Johal and Lance Brannman are employees of AstraZeneca and report stock ownership in AstraZeneca.

**Supplementary Table 1** Restricted mean overall survival calculated over 2- and 3-year time horizons for durvalumab plus etoposide and platinum and etoposide and platinum alone

| **Model** | **Durva+EP** | | **EP** | |
| --- | --- | --- | --- | --- |
| **Restricted mean survival at 2 years (years)** | **Restricted mean survival at 3 years (years)** | **Restricted mean survival at 2 years (years)** | **Restricted mean survival at 3 years (years)** |
| Kaplan-Meier curve | 1.14 | 1.33 | 1.01 | 1.09 |
| Standard parametric (log-logistic) | 1.15 | 1.34 | 1.02 | 1.13 |
| Landmark 12 weeks | 1.24 | 1.40 | 1.13 | 1.22 |
| Mixture cure model (Gompertz) | 1.14 | 1.34 | 1.01 | 1.10 |
| Non-mixture cure model | 1.14 | 1.33 | 1.01 | 1.09 |
| Spline model (spline odds 3 knots) | 1.15 | 1.32 | 1.01 | 1.10 |
| Markov model | 1.14 | 1.33 | 0.98 | 1.06 |

Abbreviations: Durva: durvalumab; EP: etoposide and platinum

**Supplementary Table 2** Overall survival extrapolation estimates for the sensitivity analyses

| **Model** | **Durva+EP** | | **EP** | |
| --- | --- | --- | --- | --- |
| **Survival at 3 years (%)** | **Survival at 5 years (%)** | **Survival at 3 years (%)** | **Survival at 5 years (%)** |
| Landmark 20 weeks | 11.0 | 3.8 | 4.0 | 0.8 |
| Standard parametric (exponential) | 12.8 | 2.6 | 7.5 | 1.3 |
| Standard parametric (Weibull) | 7.9 | 0.3 | 2.7 | 0.1 |
| Standard parametric (Gompertz) | 6.3 | 0.0 | 1.6 | 0.0 |
| Standard parametric (Log-normal) | 16.9 | 6.6 | 9.3 | 3.3 |
| Standard parametric (Generalized Gamma) | 8.1 | 0.4 | 3.1 | 0.1 |
| Spline model (spline hazard 3 knots) | 12.3 | 2.2 | 5.1 | 0.7 |
| Spline model (spline normal 3 knots) | 12.6 | 3.9 | 6.1 | 1.6 |
| Mixture cure model (Generalized Gamma) | 18.3 | 17.7 | 6.0 | 4.8 |
| Mixture cure model (Weibull) | 14.9 | 12.9 | 6.1 | 4.8 |
| Mixture cure model (log-logistic) | 14.5 | 12.9 | 7.6 | 2.8 |
| Mixture cure model (log-normal) | 15.7 | 6.7 | 7.9 | 2.4 |
| Mixture cure model (exponential) | 13.1 | 3.4 | 7.5 | 1.3 |
| Mixture cure model (Japan general population mortality) | 19.2 | 18.0 | 6.1 | 4.8 |
| Mixture cure model (Ukraine general population mortality) | 18.7 | 18.8 | 5.7 | 4.8 |

Abbreviations: Durva: durvalumab; EP: etoposide and platinum
